# Supplementary material for: Intermediates involved in serotonin oxidation catalyzed by Cu bound Aβ peptides
Source: Royal Society of Chemistry journal article supplement (doi:10.1039/d0sc06258h), 2020-12-22
Supplement: d0sc06258h1.pdf [file d0sc06258h1.pdf]

## **Supporting Information**

### **Intermediates Involved in Serotonin Oxidation Catalyzed by Cu bound A $\beta$ Peptides**

Arnab Kumar Nath, Arnab Ghatak, Abhishek Dey\*, Somdatta Ghosh  
Dey\*

| <b>Contents</b>              | <b>Page Number</b> |
|------------------------------|--------------------|
| <b>Materials and Methods</b> | <b>3-6</b>         |
| <b>Figure S1</b>             | <b>6</b>           |
| <b>Figure S2</b>             | <b>7</b>           |
| <b>Figure S3</b>             | <b>8</b>           |
| <b>Figure S4</b>             | <b>9</b>           |
| <b>Figure S5</b>             | <b>10</b>          |
| <b>Figure S6</b>             | <b>10</b>          |
| <b>Figure S7</b>             | <b>11</b>          |
| <b>Figure S8</b>             | <b>11</b>          |
| <b>Figure S9</b>             | <b>12</b>          |
| <b>Scheme 1</b>              | <b>12</b>          |
| <b>Table 1</b>               | <b>13</b>          |
| <b>References</b>            | <b>13</b>          |

## **Materials and Methods**

All reagents were of the highest grade commercially available and were used without further purification. Both A $\beta$  peptides of 1-16 and 1-40 chain length are used for UV-Vis experiments and kinetic assay experiments for serotonin oxidation. HPLC analysis for serotonin oxidation, EPR and resonance Raman experiments for the reaction of Cu-A $\beta$  + H<sub>2</sub>O<sub>2</sub> is performed with A $\beta$  peptide of chain length 1-16. All peptides were purchased from Ontores, China with >95% purity. Copper sulfate (CuSO<sub>4</sub>), Serotonin and HEPES buffer were purchased from Sigma. Sulphuric acid and NaOH were purchased from Merck. D<sub>2</sub>O was purchased from Cambridge Isotope Laboratory.

All of the pH 7 peptide stock solutions were made in 100 mM N-(hydroxyethyl)piperazine-N'-2-ethanesulfonic acid (HEPES) buffer. A $\beta$  stock solution of 1 mM strength was prepared by dissolving in 100 mM pH 7 HEPES buffer. In all the experiments A $\beta$ (1-16) peptide is used. The Cu(II)-A $\beta$  complex was prepared by incubating 0.8 equivalent of CuSO<sub>4</sub> with 1 equivalent of A $\beta$  for ~1 h. The pH was maintained at 7 by adding H<sub>2</sub>SO<sub>4</sub> and 1M NaOH. Strength of serotonin was 7.4 mM (10 eq) and was prepared by dissolving it in 100 mM HEPES buffer. H<sub>2</sub>O<sub>2</sub> is prepared by diluting the 10 M stock solution to 1 M by Millipore water and aliquots were added to adjust the final concentration to the desired value (50-1000 eq.).

## **Physical Methods**

### **Absorption spectra**

Absorption spectra were recorded by adding H<sub>2</sub>O<sub>2</sub> into ~300  $\mu$ L of the Cu-A $\beta$  complex solution in a cuvette of 1 cm path length. Concentration of Cu-A $\beta$  were 0.16 mM, 0.74 mM and 1.38 mM and that of H<sub>2</sub>O<sub>2</sub> were 100 mM, 1 M and 10 M respectively. Concentration of H<sub>2</sub>O<sub>2</sub> in the final solution were 1.6 mM (0.16 mM Cu-A $\beta$  + 10 eqv

H<sub>2</sub>O<sub>2</sub>), 7.4 mM (0.74 mM Cu-A $\beta$  + 10 eqv H<sub>2</sub>O<sub>2</sub>), 37 mM (0.74 mM Cu-A $\beta$  + 50 eqv H<sub>2</sub>O<sub>2</sub>), 69 mM (1.38 mM Cu-A $\beta$  + 50 eqv H<sub>2</sub>O<sub>2</sub>). Absorption spectra were obtained by a UV-Vis diode array spectrophotometer (Agilent 8453).

### **Serotonin Oxidation**

Absorption spectra and kinetics of serotonin oxidation was monitored in a UV-vis diode array spectrophotometer (Agilent 8453). The concentration of serotonin solution was 7.4 mM and 13.8 mM respectively. Strength of Cu-A $\beta$  solutions were 0.16 mM, 0.74 and 1.38 mM and strength of H<sub>2</sub>O<sub>2</sub> were 100 mM, 500 mM and 10 M respectively.

Kinetics experiments for serotonin oxidation for Cu-A $\beta$ (1-16) (0.74 mM) + 50 eqv H<sub>2</sub>O<sub>2</sub> were performed in the presence of 50 eqv serotonin. Concentrations of Cu-A $\beta$ , H<sub>2</sub>O<sub>2</sub> and 5-HT in the final solution were 0.055 mM, 2.77 mM and 2.77 mM, respectively. Similarly serotonin oxidation for Cu-A $\beta$ (1-16) (1.38 mM) + 50 eqv H<sub>2</sub>O<sub>2</sub> in the presence of 50 eqv serotonin were also performed. Concentrations of Cu-A $\beta$ , H<sub>2</sub>O<sub>2</sub> and 5-HT in the final solution were 0.10 mM, 5.0 mM and 5.0 mM, respectively.

Kinetics experiments for serotonin oxidation for Cu-A $\beta$ (1-16) (0.74 mM) + 1000 eqv H<sub>2</sub>O<sub>2</sub> were performed by adding 50 eqv serotonin. Concentrations of Cu-A $\beta$ , H<sub>2</sub>O<sub>2</sub> and 5-HT in the final solution are 0.055 mM, 55.5 mM and 2.77 mM, respectively.

Comparison of serotonin oxidation for Cu-A $\beta$ (1-16) and Cu-A $\beta$ (1-40) was done by following the kinetics at 392 nm keeping Cu-A $\beta$  : H<sub>2</sub>O<sub>2</sub> : 5-HT (1:50:50) and final concentrations 0.012 mM, 0.60 mM and 0.60 mM respectively.

### **EPR**

EPR samples were 0.74 mM and 1.38 mM in concentration and 100  $\mu$ L in volume and were run at 77 K in a liquid nitrogen finger dewar. EPR spectra were obtained by a JEOL FA200 spectrophotometer with the

following parameters: modulation width, 14 gauss; amplitude, 30; time constant, 300 ms; power, 1 mW; frequency, 9.14 GHz.

## **Resonance Raman**

RR data were obtained using a Trivista 555 spectrograph (Princeton Instruments) using 415.4 nm excitation from a Kr<sup>+</sup> laser (Coherent, Sabre Innova SBRC-DBW-K). The power on the samples was ~10 mW. The rR samples were 1.38 mM in concentration and were prepared by adding 50 and 1000 equivalents of H<sub>2</sub>O<sub>2</sub> to Cu-A $\beta$ (1-16) and freezing the sample in liquid nitrogen at 77 K. For isotope labelling Cu-A $\beta$ (1-16) is prepared in HEPES buffer (H<sub>2</sub>O and D<sub>2</sub>O) and then same protocols as that of H<sub>2</sub>O are followed.

## **HPLC**

Oxidation products of 5-HT by Cu-A $\beta$  complexes were separated by reversed-phase HPLC (RP-HPLC) using a Waters 1525 Separation Module coupled to a diode-array detector (Waters 2487). A SymmetryR C18 reversed-phase column (250 mm X 4.6 mm internal diameter, 5  $\mu$ m particle size) (SHIMADZU CORP.) was used to separate 5-HT from its oxidation products using the linear gradient method. The mobile phase consisted of eluant A (1 % acetic acid and 1 mM ammonium acetate in water) and eluant B (100 % acetonitrile). The gradients applied were 0–10 min, 98–85 % eluant A; 10–12 min, 85–50 % eluant A; 12–14 min, 50 % eluant A. The flow rate was 0.8 mL/min. For the HPLC assay, 7.4 mM 5-HT was incubated with Cu-A $\beta$  (0.74 mM) + H<sub>2</sub>O<sub>2</sub> (1 M for 50 eqv. and 10 M for 1000 eqv.) aliquot in 100 mM HEPES, pH 8 with a conc. ratio of Cu-A $\beta$ , H<sub>2</sub>O<sub>2</sub> and serotonin to be 1: 50/1000 : 50. At specific time intervals, the oxidation products were analysed by injecting 25  $\mu$ L of the reaction mixture into the column. Serotonin and its oxidation products were analysed with a UV-online detector set at 260 nm.

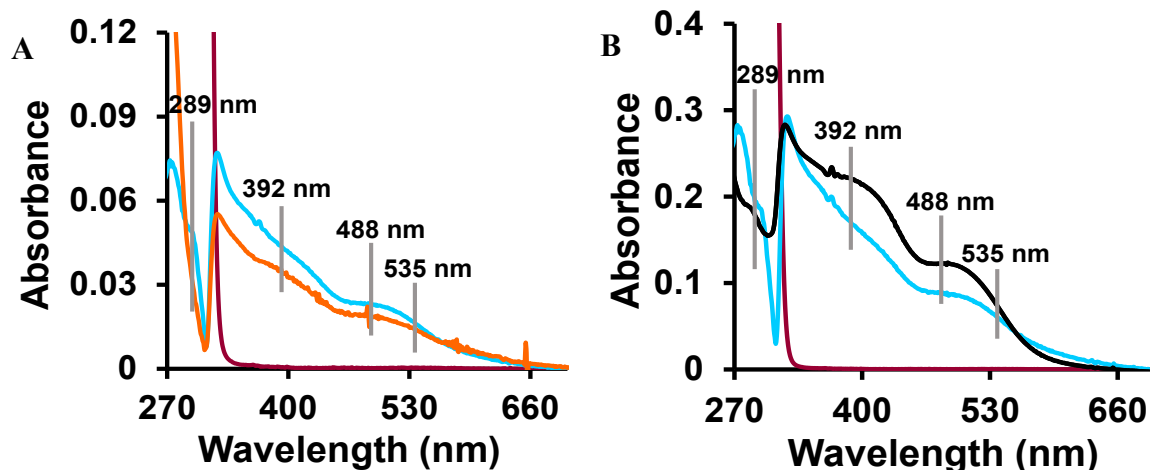

**Figure S1.** A) Absorption spectrum of serotonin (5-HT), red; for the reaction 0.012 mM Cu-A $\beta$ (1-16) + 0.60 mM H<sub>2</sub>O<sub>2</sub> + 0.60 mM 5-HT (1:50:50), cyan and 0.012 mM Cu-A $\beta$ (1-40) + 0.60 mM H<sub>2</sub>O<sub>2</sub> + 0.60 mM 5-HT (1:50:50), orange;

B) Absorption spectrum of serotonin (5-HT), red; absorption spectrum for the reaction 0.055 mM Cu-A $\beta$ (1-16) + 2.77 mM H<sub>2</sub>O<sub>2</sub> + 2.77 mM 5-HT (1:50:50), black and 0.012 mM Cu-A $\beta$ (1-16) + 0.60 mM H<sub>2</sub>O<sub>2</sub> + 0.60 mM 5-HT (1:50:50) scaled, cyan; in 100 mM HEPES buffer at pH 7.

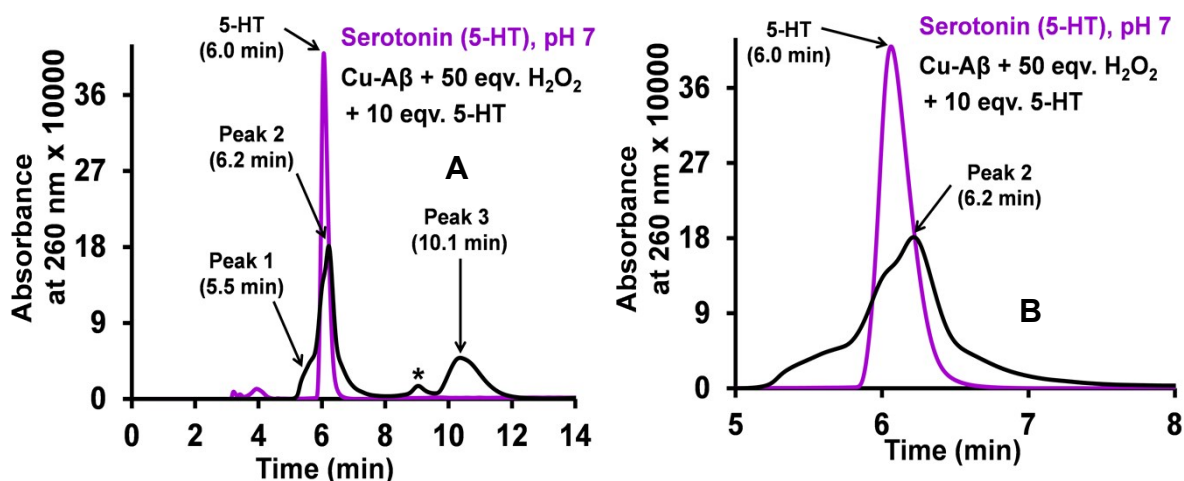

**Figure S2:** Separation of the 5-HT and its products by RP-HPLC after its incubation with Cu-A $\beta$  + 50 eqv. H<sub>2</sub>O<sub>2</sub>; 5-HT without reaction mixture purple, separated reaction mixture at 5.5 min, 6.2 min and 10.1 min after incubation resulting in major products (peak 1, peak 2 and peak 3), black A) full range, B) elution time from 5 min to 8 min; in 100 mM HEPES buffer at pH 7. The peaks with star marking (\*) is the minor product which is other oxidized products of serotonin.

HPLC shows that serotonin in the presence of Cu-A $\beta$  and H<sub>2</sub>O<sub>2</sub> oxidizes to 5-Hydroxy-3-ethylamino-2-oxindole (5-HEO) (peak 1) and tryptamine-4,5-dione (peak 2). In the chromatogram, peak 3 represents 3,3'-bis(2-aminoethyl)-5-hydroxy-[3,7'-bi-1H-indole]-2,4',5'(3H)-trione which is the dimerized form of the two oxidized products, which correspond to peak 1 and peak 2 and possibly forms through aerial oxidation (Scheme S1).<sup>1, 2</sup>

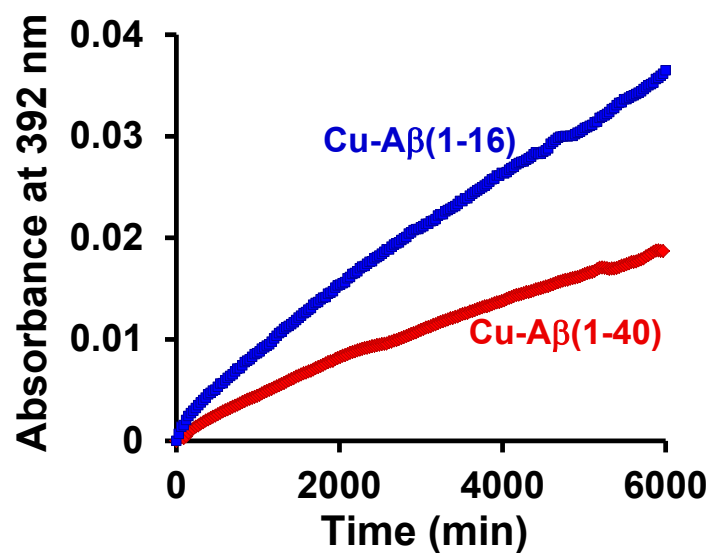

**Figure S3.** Kinetics of serotonin oxidation monitored at 392 nm for the reaction 0.012 mM Cu-A $\beta$ (1-16) + 0.60 mM H<sub>2</sub>O<sub>2</sub> + 0.60 mM 5-HT (1:50:50), blue and 0.012 mM Cu-A $\beta$ (1-40) + 0.60 mM H<sub>2</sub>O<sub>2</sub> + 0.60 mM 5-HT (1:50:50), red; in 100 mM HEPES buffer at pH 7.



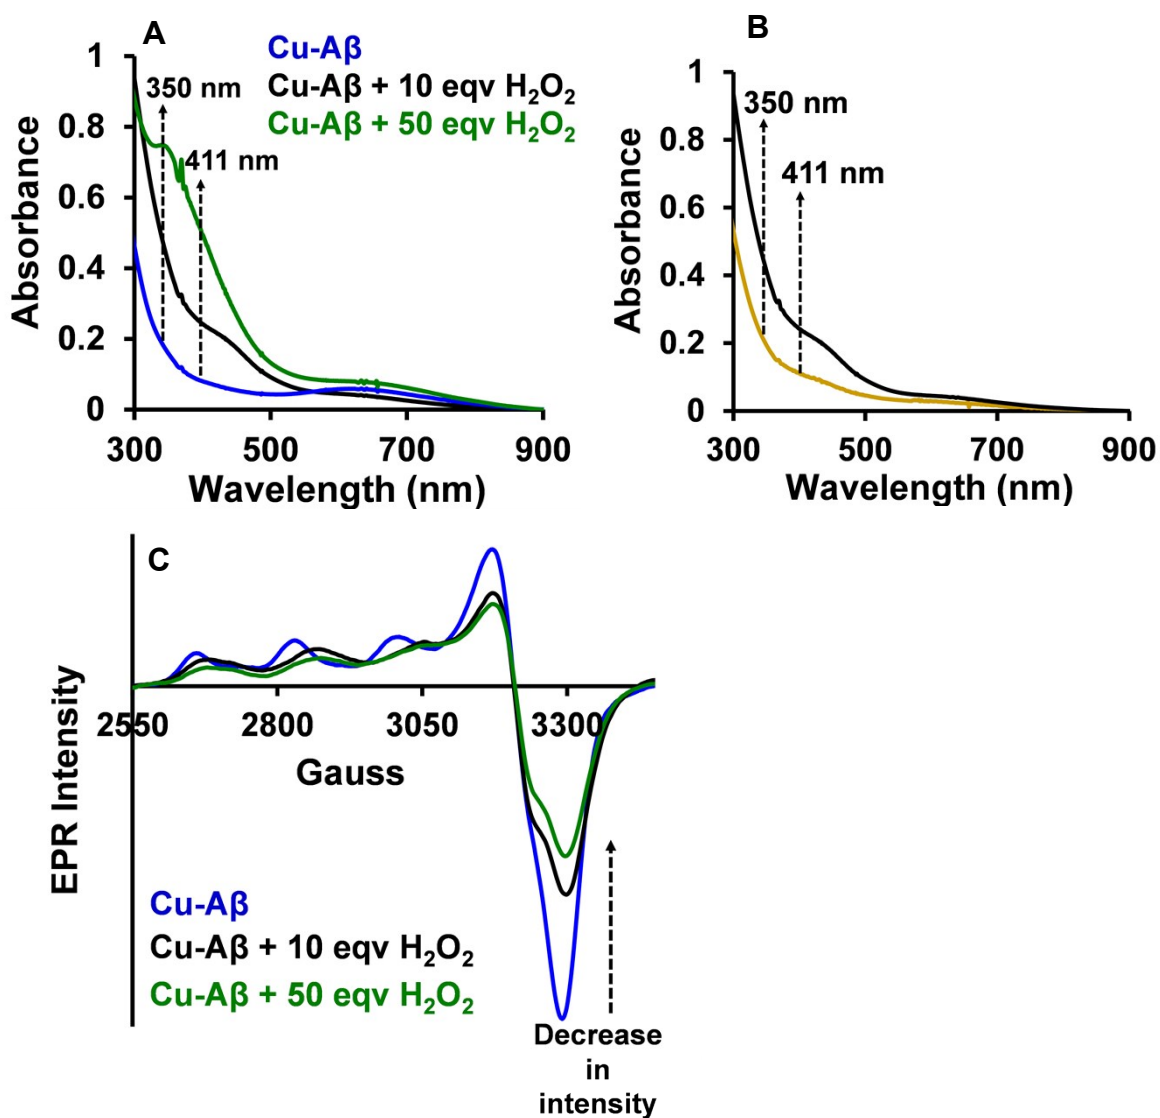

**Figure S4.** A) Absorption spectrum of Cu-A $\beta$ , blue; for the reaction of 0.74 mM Cu-A $\beta$ (1-16) + 7.4 mM H<sub>2</sub>O<sub>2</sub> (1:10) after 2 hours, black and 0.74 mM Cu-A $\beta$ (1-16) + 37 mM H<sub>2</sub>O<sub>2</sub> (1:50) after 2 hours, green; in 100 mM HEPES buffer at pH 7.

B) Absorption spectrum for the reaction of 0.74 mM Cu-A $\beta$ (1-16) + 7.4 mM H<sub>2</sub>O<sub>2</sub> (1:10), black and 0.16 mM Cu-A $\beta$ (1-16) + 1.6 mM H<sub>2</sub>O<sub>2</sub> (1:10), yellow; in 100 mM HEPES buffer at pH 7.

C) EPR spectra of Cu-A $\beta$ , blue; for the reaction of 0.74 mM Cu-A $\beta$ (1-16) + 7.4 mM H<sub>2</sub>O<sub>2</sub> (1:10) after 2 hours, black and 0.74 mM Cu-A $\beta$ (1-16) + 37 mM H<sub>2</sub>O<sub>2</sub> (1:50) after 2 hours, green, at 77 K; The arrows indicate the direction of the spectral changes. All data are collected in 100 mM HEPES buffer at pH 7, at 77 K.

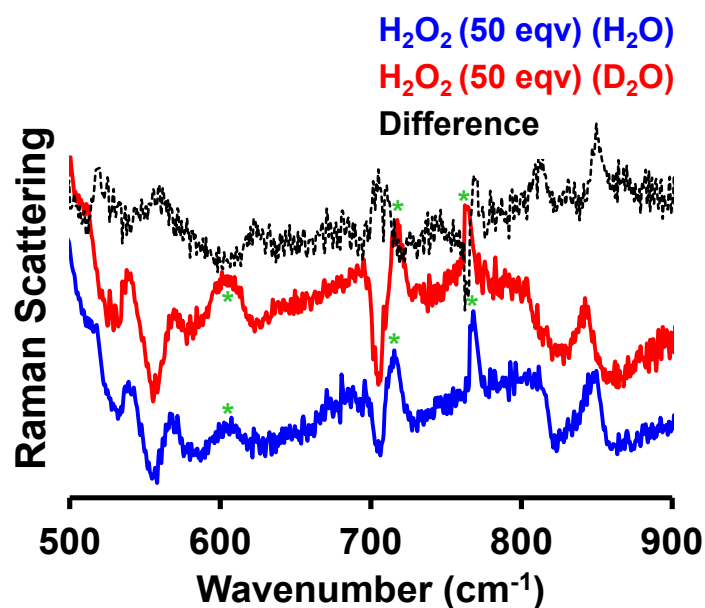

**Figure S5:** The extended spectra of Cu-A $\beta$  + 50 eq.  $\text{H}_2\text{O}_2$  (blue) and Cu-A $\beta$  + 50 eq.  $\text{D}_2\text{O}_2$  (red) and difference (dashed black). The peaks arising from glass tube and buffer are indicated with \*.

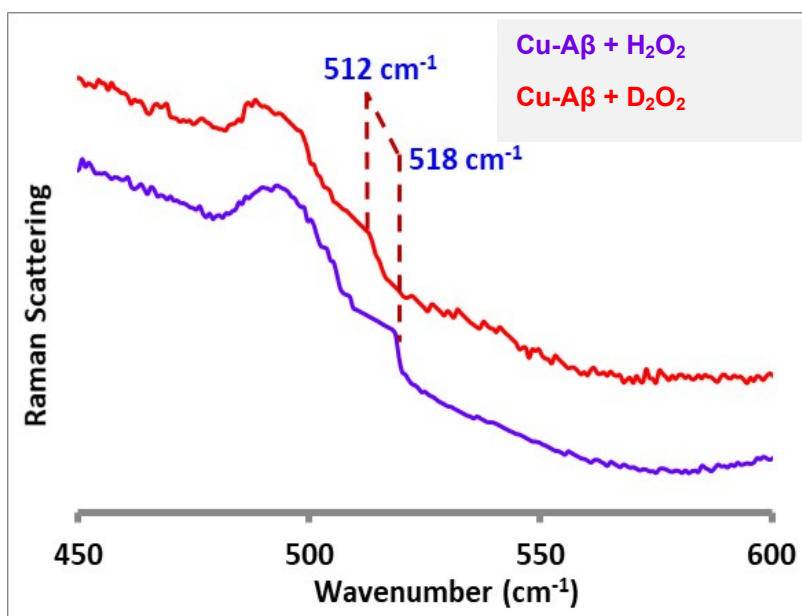

**Figure S6:** Cu-O vibration in Cu-A $\beta$  + 1000 eq.  $\text{H}_2\text{O}_2$  (purple) and Cu-A $\beta$  + 1000 eq.  $\text{D}_2\text{O}_2$  (red)

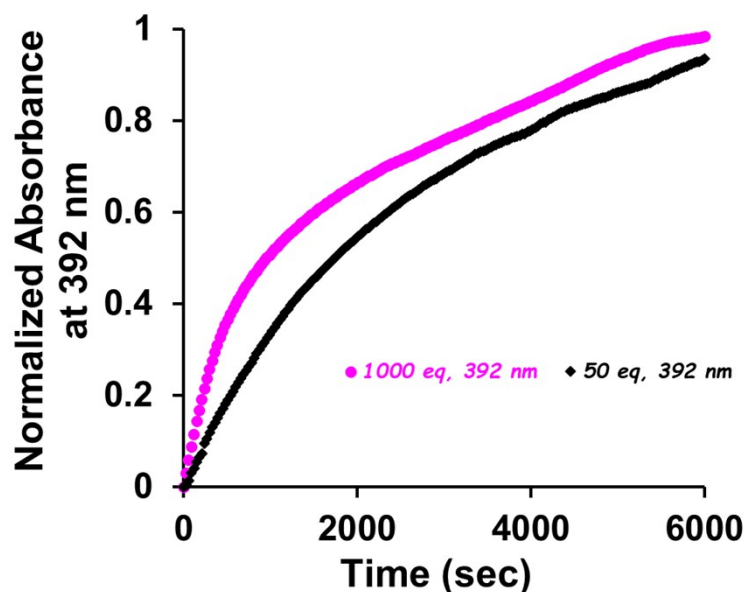

**Figure S7:** Kinetics of 5-HT oxidation catalysed by Cu-A $\beta$  using 1000 eq. H<sub>2</sub>O<sub>2</sub> (purple) and 50 eq. H<sub>2</sub>O<sub>2</sub> (black).

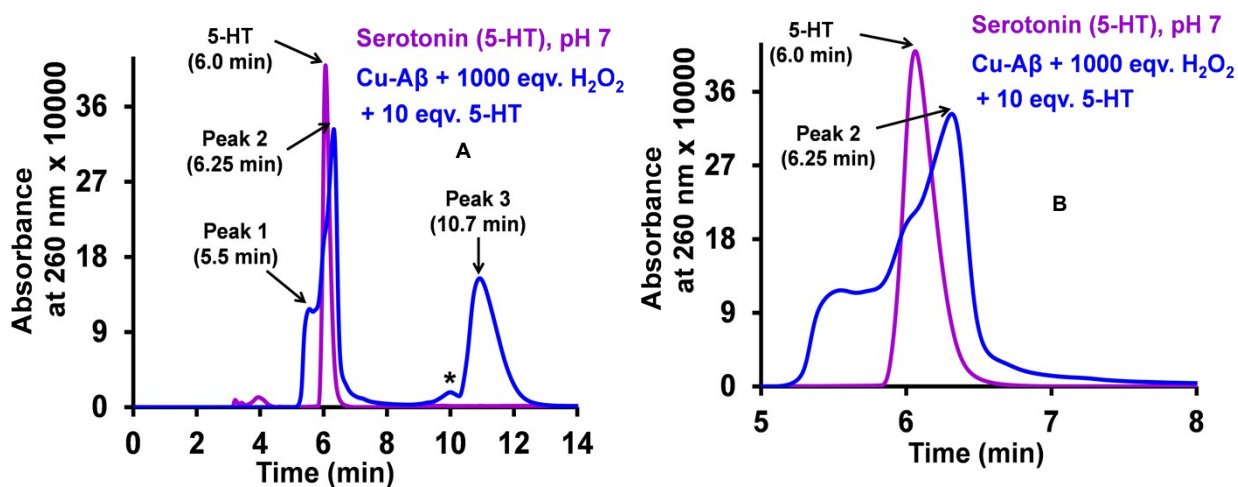

**Figure S8:** Separation of the 5-HT and its products by RP-HPLC after its incubation with Cu-A $\beta$  + 1000 eq. H<sub>2</sub>O<sub>2</sub>; 5-HT without reaction mixture purple, separated reaction mixture at 5.5 min, 6.25 min and 10.7 min after incubation resulting in major products (peak 1, peak 2 and peak 3), black A) full range, B) elution time from 5 min to 8 min; in 100 mM HEPES buffer at pH 7. The peaks with star marking (\*) is the minor product which is other oxidized products of serotonin.

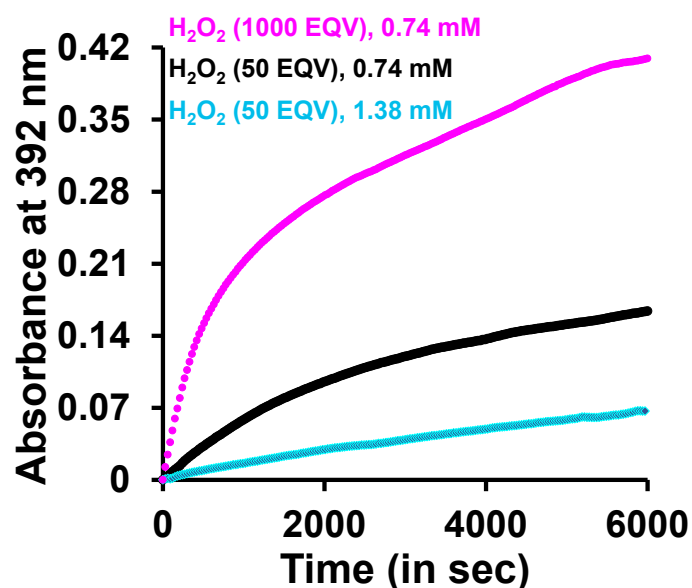

**Figure S9:** Kinetics of 5-HT oxidation catalysed by Cu-A $\beta$  using Cu-A $\beta$  (0.74 mM) + 1000 eq. H<sub>2</sub>O<sub>2</sub> (purple), Cu-A $\beta$  (0.74 mM) + 50 eq. H<sub>2</sub>O<sub>2</sub> (black) and Cu-A $\beta$  (1.38 mM) + 50 eq. H<sub>2</sub>O<sub>2</sub> (cyan).

**Scheme S1:** Serotonin oxidation by Cu-A $\beta$  with H<sub>2</sub>O<sub>2</sub> (50 and 1000 H<sub>2</sub>O<sub>2</sub>) at pH 7

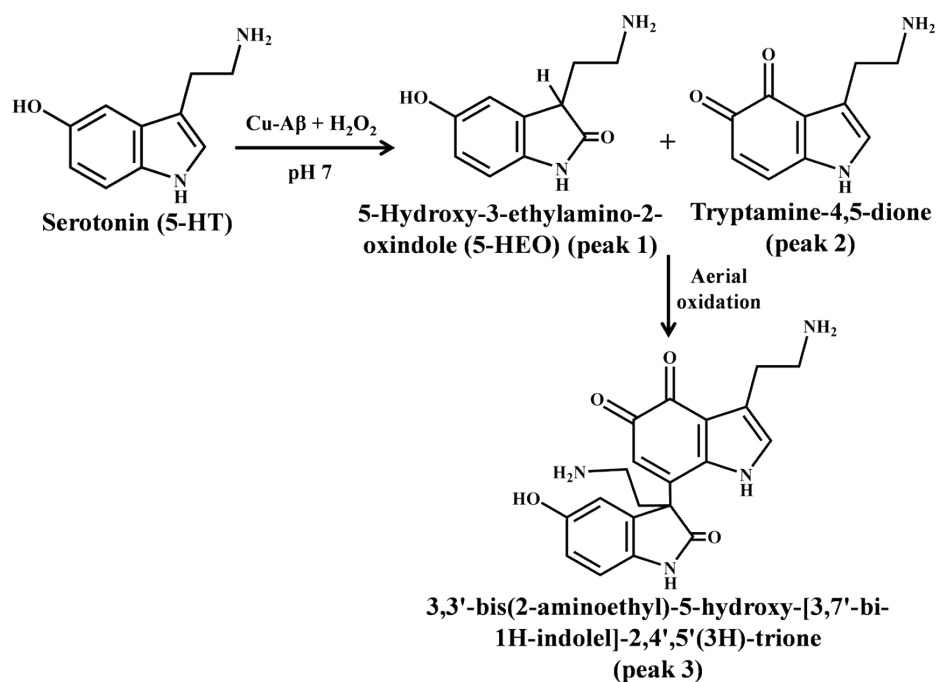

**Table S1.** Rate of serotonin oxidation for different Cu-A $\beta$  + H<sub>2</sub>O<sub>2</sub> conditions.

| <b>Cu-A<math>\beta</math> + H<sub>2</sub>O<sub>2</sub> for<br/>10 eq 5-HT</b>              | <b>Rate const.<br/>(Sec<sup>-1</sup>) <math>\times 10^{-4}</math></b> |
|--------------------------------------------------------------------------------------------|-----------------------------------------------------------------------|
| <b>Cu-A<math>\beta</math> (0.74 mM) + 1000 eq H<sub>2</sub>O<sub>2</sub><br/>at 15 min</b> | <b>6.2 <math>\pm</math> 0.1</b>                                       |
| <b>Cu-A<math>\beta</math> (0.74 mM) + 50 eq H<sub>2</sub>O<sub>2</sub><br/>at 100 min</b>  | <b>4.0 <math>\pm</math> 0.2</b>                                       |
| <b>Cu-A<math>\beta</math> (1.38 mM) + 50 eq H<sub>2</sub>O<sub>2</sub><br/>at 100 min</b>  | <b>2.5 <math>\pm</math> 0.2</b>                                       |

## References

1. M. Z. Wrona, Z. Yang, M. McAdams, S. O'Connor-Coates and G. Dryhurst, *Journal of Neurochemistry*, 1995, **64**, 1390-1400.
2. V. F. Ximenes, G. J. Maghzal, R. Turner, Y. Kato, C. C. Winterbourn and A. J. Kettle, *The Biochemical journal*, 2009, **425**, 285-293.
